# Supplementary material for: Covalently functionalized graphene oxide wrapped by silicon–nitrogen-containing molecules: preparation and simultaneous enhancement of the thermal stability, flame retardancy and mechanical properties of epoxy resin nanocomposites
Source: Royal Society of Chemistry journal article supplement (doi:10.1039/d0ra01866j), 2020-01-01
Supplement: d0ra01866j1.pdf [file d0ra01866j1.pdf]

## Supporting information

### 2.Experimental

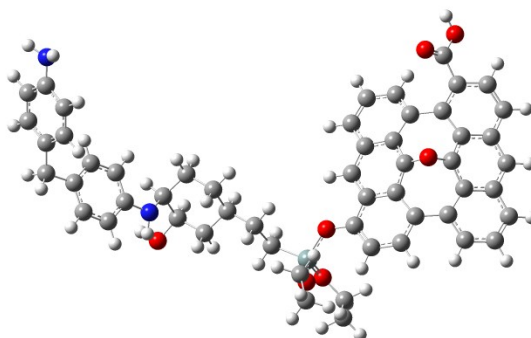

**Fig. S1** Molecular structures of FR-fGO

### 3.Results and discussion

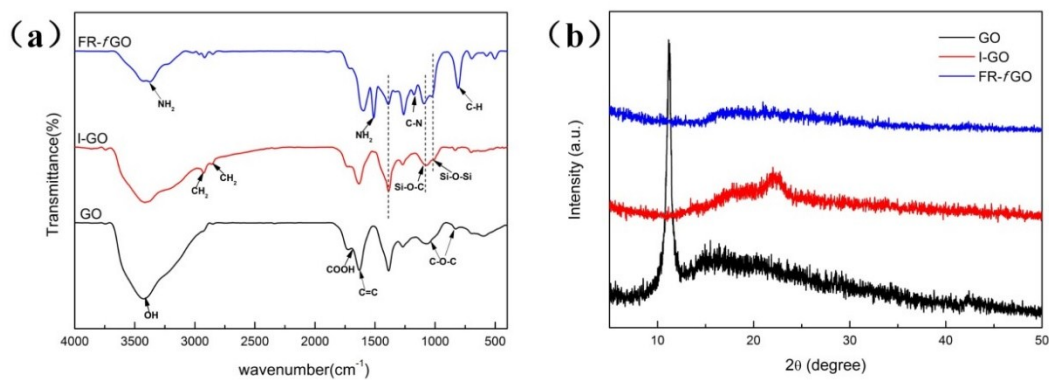

**Fig. S2** FTIR spectra (a) and XRD patterns (b) of GO, I-GO, and FR-fGO.

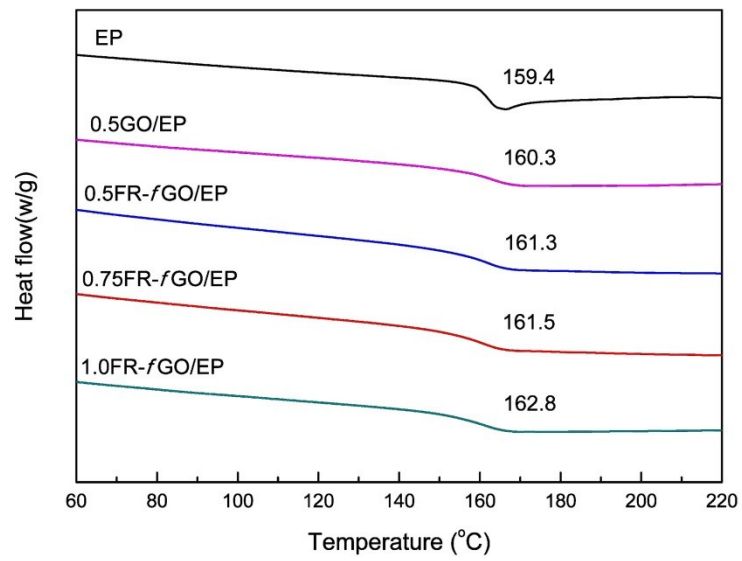

**Fig. S3** DSC thermograms of EP and its composites

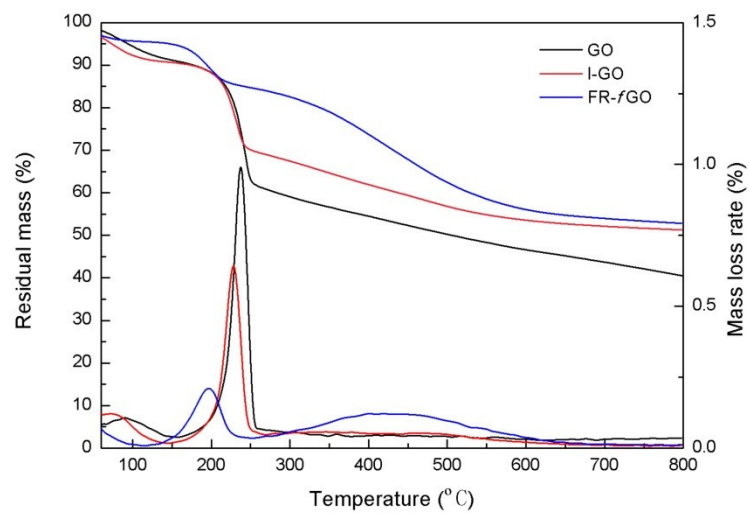

**Fig. S4** TGA and DTG curves of GO, I-GO, and FR-*f*GO under nitrogen atmosphere.

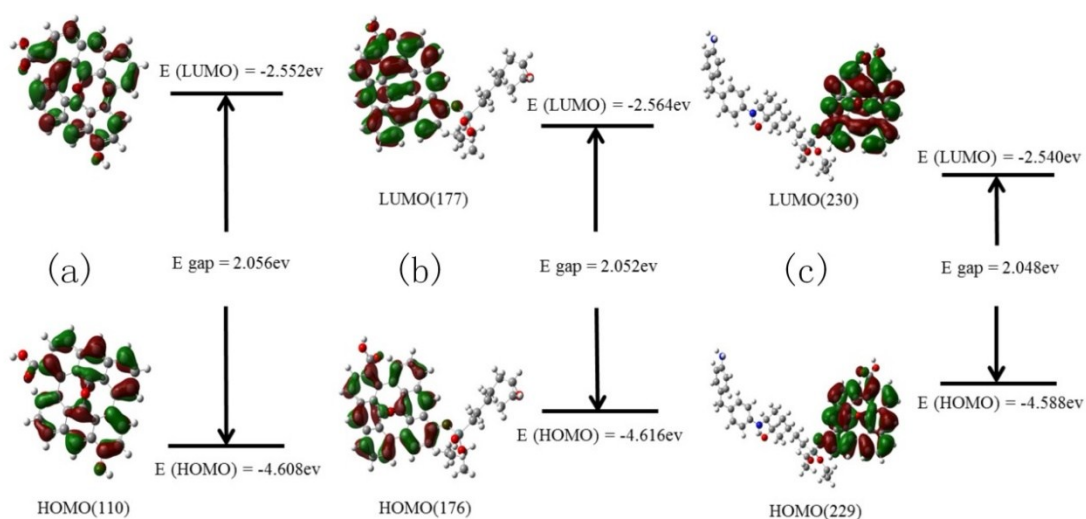

**Fig. S5** HOMO and LUMO patterns of (a) GO, (b) l-GO, and (c) FR-fGO obtained at B3LYP/6-31++G (d, p) level.

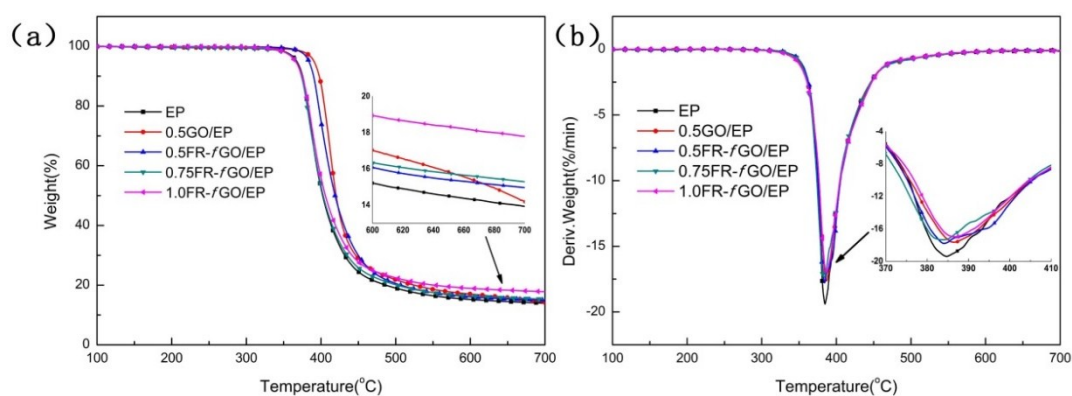

**Fig. S6** TGA and DTG curves of EP and its composites (a and b) under nitrogen atmosphere.

**Table S1** Cone calorimetry data of pure EP and its composites.

| Samples      | PHRR                 | THR                  | PSPR                | TSP               | COP   | CO <sub>2</sub> P | Residue |
|--------------|----------------------|----------------------|---------------------|-------------------|-------|-------------------|---------|
|              | (kw/m <sup>2</sup> ) | (MJ/m <sup>2</sup> ) | (m <sup>2</sup> /s) | (m <sup>2</sup> ) | (g/s) | (g/s)             | (wt%)   |
| EP           | 1497.8               | 126.7                | 0.5                 | 53.5              | 0.05  | 0.96              | 14.3    |
| 1.0FR-fGO/EP | 927.2                | 74.3                 | 0.3                 | 25.1              | 0.02  | 0.29              | 17.2    |

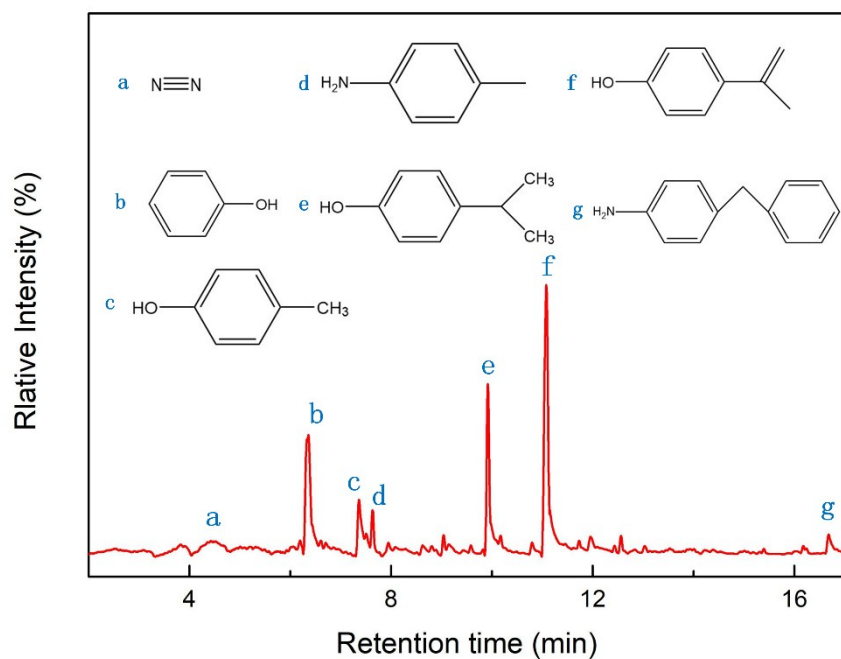

**Fig. S7** Gas chromatography spectra of DDM and its corresponding pyrolysis products.

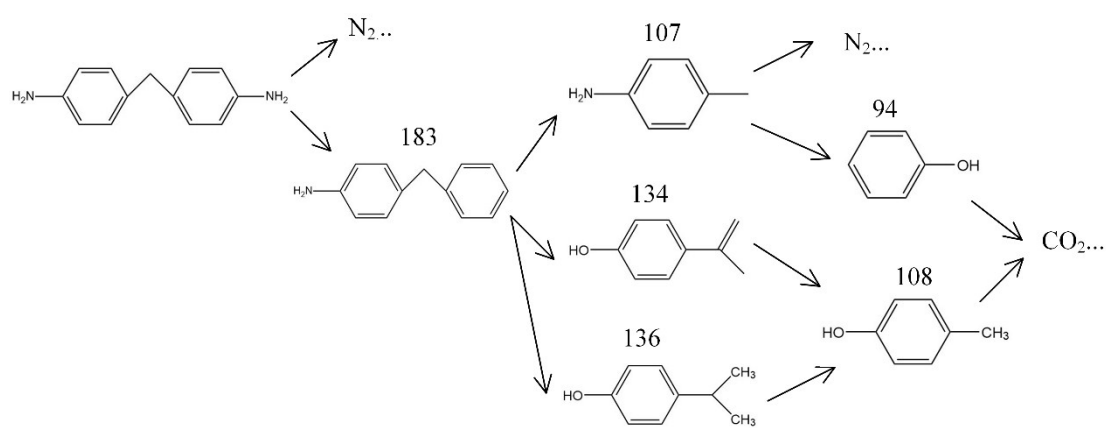

**Fig. S8** Proposed pyrolysis process of DDM

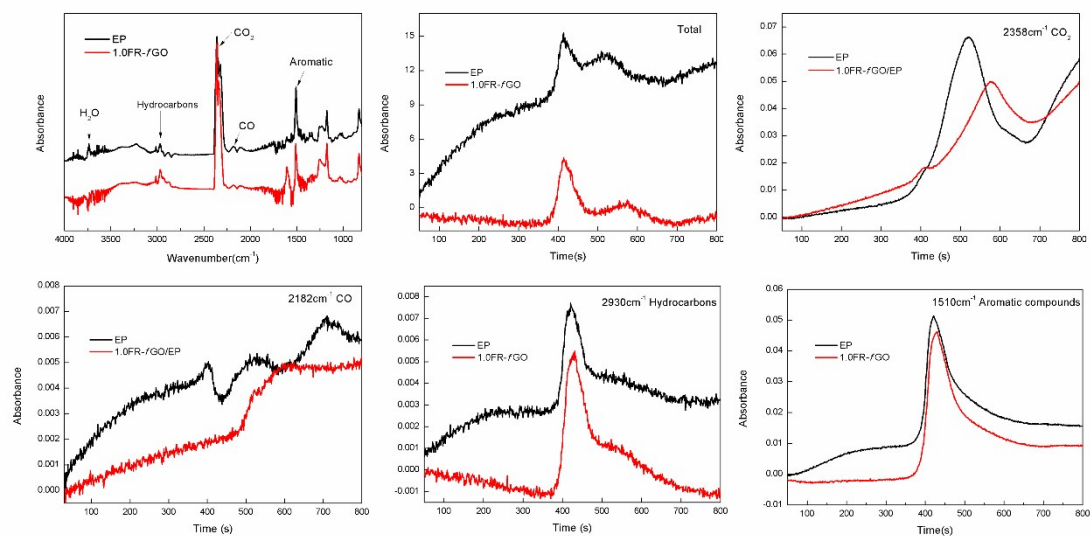

**Fig. S9** FTIR spectra of pyrolysis gaseous products emitted from pure EP and 1.0FR-fGO/EP composites at maximum degradation rate (a); total absorbance of pyrolysis products for pure EP and 1.0FR-fGO/EP composites (b); absorbance of pyrolysis products for pure EP and 1.0FR-fGO/EP composites versus time: CO<sub>2</sub> (c), CO (d), hydrocarbons (e), and aromatic compounds (f).

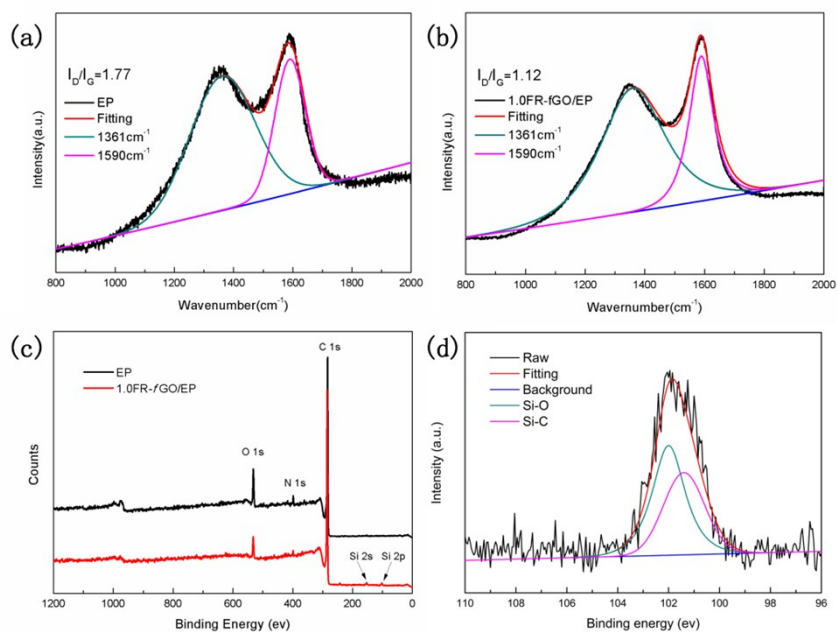

**Fig. S10** Raman spectra of residual chars of pure EP (a) and 1.0FR-fGO/EP composites (b); XPS spectra of EP and 1.0FR-fGO/EP composites of residual chars (c) and Si 2p spectra of char layers of 1.0FR-fGO/EP composites.

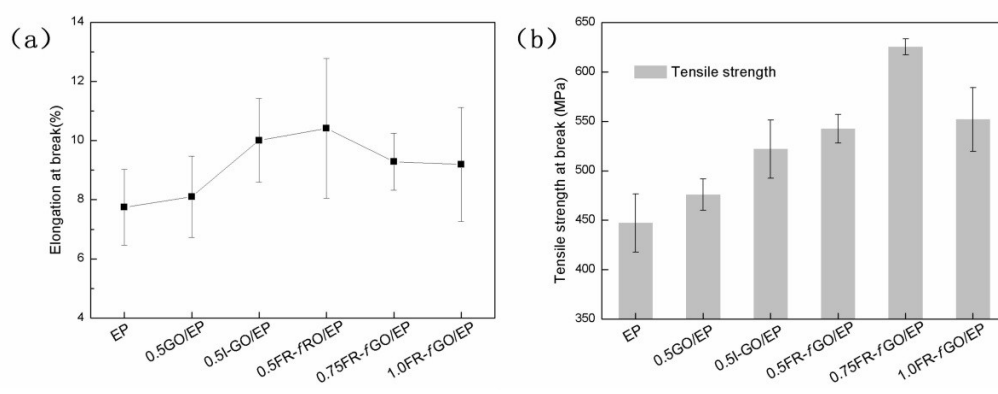

**Fig. S11** Mechanical properties of pure EP and its composites: (a) Elongation at break and (b) tensile strength.
